# Supplementary material for: Rapid and accurate determination of chlorine isotopic ratios with ICP-MS/MS using O2 reaction gas
Source: Royal Society of Chemistry journal article supplement (doi:10.1039/d4ja00191e), 2024-01-01
Supplement: d4ja00191e1.xlsx [file d4ja00191e1.xlsx]

## Sheet: NIST SRM 975a data_natural
	Raw instrumental data from Agilent QQQ-ICP-MS/MS for repeat measurements of NIST SRM 975a chlorine isotopic ratio standard
			35 -> 51		37 -> 53
	Sample Name	Comment	CPS	CPS RSD	CPS	CPS RSD
	10 ppm NIST #1		972391	0.123073	311156	0.129389
	10 ppm NIST #2		976004	0.714814	312685	0.624411
	10 ppm NIST #3		982002	0.464776	314503	0.364603
	10 ppm NIST #4		983457	0.785591	314901	0.732497
	10 ppm NIST #5		991895	0.47198	318266	0.424195
	10 ppm NIST #6		989393	0.191004	316760	0.15788
	10 ppm NIST #7		986817	0.176143	316983	0.332991
	10 ppm NIST #8		996853	0.0983888	318201	0.128161
	10 ppm NIST #9		999869	0.485273	319620	0.555126
	10 ppm NIST #10		1.00142e+06	0.0747281	320354	0.150021
	10 ppm NIST #11		1.0093e+06	0.170206	322643	0.208836
	10 ppm NIST #12		1.00822e+06	0.129847	322353	0.216983
	10 ppm NIST #13		1.00156e+06	0.475487	320148	0.392136
	10 ppm NIST #14		1.00724e+06	0.674809	321178	0.380338
	10 ppm NIST #15		1.01464e+06	0.372563	323376	0.288604
	10 ppm NIST #16		997829	0.303904	320001	0.32718

## Sheet: Enriched Cl isotopes table
		Comparison of calculated and measured chlorine isotopic composition and fraction 37Cl for enriched 37Cl solutions in shown in Figure 2. Note that the buffer solution reported here started as a mixture of 60 mM KCl, 0.4 mM Orange G, 10 mM EACA titrated to pH 10 using NH4OH, and 10 mM ammonium thiosulfate titrated to pH 9.29 with NH4OH.
		NIST SRM 975a matrix
		37Cl/35Clcalc	37Cl/35Clmeas	1σ	% diff		Fract. 37Clcalc	Fract. 37Clmeas	1σ	% diff
		0.3197	0.320023	0.00133481	0.0010099		0.242252	0.242437	0.0010112	0.000765062
		0.423513	0.424617	0.00116284	0.00260535		0.297513	0.298057	0.000816247	0.00182881
		0.587075	0.576435	0.00196315	-0.0181234		0.36991	0.365657	0.00124531	-0.0114965
		0.745696	0.737055	0.00562063	-0.0115885		0.427163	0.424313	0.00323573	-0.00667135
		HCl matrix
		37Cl/35Clcalc	37Cl/35Clmeas	1σ	% diff		Fract. 37Clcalc	Fract. 37Clmeas	1σ	% diff
		0.3197	0.319247	0.00290686	-0.00141709		0.242252	0.241992	0.00220342	-0.00107417
		0.861135	0.862237	0.00876598	0.00127865		0.462694	0.463011	0.00470723	0.000686619
		2.38686	2.39164	0.0238872	0.00200257		0.704742	0.705158	0.00704296	0.000590443
		18.2385	18.2463	0.14241	0.000429469		0.948021	0.948042	0.00739933	2.23143e-05
		52.2466	53.3745	0.503625	0.0215885		0.981219	0.981609	0.00926214	0.000397033
		Buffer matrix
		37Cl/35Clcalc	37Cl/35Clmeas	1σ	% diff		Fract. 37Clcalc	Fract. 37Clmeas	1σ	% diff
		0.3197	0.319023	0.00107551	-0.00211795		0.242252	0.241863	0.000815382	-0.00160569
		0.4241	0.420011	0.000951588	-0.00964341		0.297802	0.29578	0.000670128	-0.00679108
		0.582555	0.5752	0.00373049	-0.012626		0.36811	0.36516	0.00236827	-0.00801548
		0.743078	0.729527	0.0030353	-0.0182363		0.426302	0.421807	0.00175499	-0.0105441
