# Supplementary material for: Rapid and accurate determination of chlorine isotopic ratios with ICP-MS/MS using O2 reaction gas
Source: Royal Society of Chemistry journal article supplement (doi:10.1039/d4ja00191e), 2024-01-01
Supplement: d4ja00191e2.pdf [file d4ja00191e2.pdf]

**Supplement 1:** Comparison of calculated and measured chlorine isotopic composition and fraction  $^{37}\text{Cl}$  for natural and enriched  $^{37}\text{Cl}$  solutions shown in Figure 2. Note that the buffer solution reported here started as a mixture of 60 mM KCl, 0.4 mM Orange G, 10 mM EACA titrated to pH 10 using  $\text{NH}_4\text{OH}$ , and 10 mM ammonium thiosulfate titrated to pH 9.29 with  $\text{NH}_4\text{OH}$ .

| <b><i>NIST SRM 975a matrix</i></b>            |                                               |           |        |                                       |                                       |           |        |
|-----------------------------------------------|-----------------------------------------------|-----------|--------|---------------------------------------|---------------------------------------|-----------|--------|
| $^{37}\text{Cl}/^{35}\text{Cl}_{\text{calc}}$ | $^{37}\text{Cl}/^{35}\text{Cl}_{\text{meas}}$ | $1\sigma$ | % diff | Fract. $^{37}\text{Cl}_{\text{calc}}$ | Fract. $^{37}\text{Cl}_{\text{meas}}$ | $1\sigma$ | % diff |
| 0.3197                                        | 0.3200                                        | 0.0013    | 0.10%  | 0.2423                                | 0.2424                                | 0.0010    | 0.08%  |
| 0.4235                                        | 0.4246                                        | 0.0012    | 0.26%  | 0.2975                                | 0.2981                                | 0.0008    | 0.18%  |
| 0.5871                                        | 0.5764                                        | 0.0020    | -1.81% | 0.3699                                | 0.3657                                | 0.0012    | -1.15% |
| 0.7457                                        | 0.7371                                        | 0.0056    | -1.16% | 0.4272                                | 0.4243                                | 0.0032    | -0.67% |
| <b><i>HCl matrix</i></b>                      |                                               |           |        |                                       |                                       |           |        |
| $^{37}\text{Cl}/^{35}\text{Cl}_{\text{calc}}$ | $^{37}\text{Cl}/^{35}\text{Cl}_{\text{meas}}$ | $1\sigma$ | % diff | Fract. $^{37}\text{Cl}_{\text{calc}}$ | Fract. $^{37}\text{Cl}_{\text{meas}}$ | $1\sigma$ | % diff |
| 0.3197                                        | 0.3192                                        | 0.0029    | -0.14% | 0.2423                                | 0.2420                                | 0.0022    | -0.11% |
| 0.8611                                        | 0.8622                                        | 0.0088    | 0.13%  | 0.4627                                | 0.4630                                | 0.0047    | 0.07%  |
| 2.3869                                        | 2.3916                                        | 0.0239    | 0.20%  | 0.7047                                | 0.7052                                | 0.0070    | 0.06%  |
| 18.2385                                       | 18.2463                                       | 0.1424    | 0.04%  | 0.9480                                | 0.9480                                | 0.0074    | 0.00%  |
| 52.2466                                       | 53.3745                                       | 0.5036    | 2.16%  | 0.9812                                | 0.9816                                | 0.0093    | 0.04%  |
| <b><i>Buffer matrix</i></b>                   |                                               |           |        |                                       |                                       |           |        |
| $^{37}\text{Cl}/^{35}\text{Cl}_{\text{calc}}$ | $^{37}\text{Cl}/^{35}\text{Cl}_{\text{meas}}$ | $1\sigma$ | % diff | Fract. $^{37}\text{Cl}_{\text{calc}}$ | Fract. $^{37}\text{Cl}_{\text{meas}}$ | $1\sigma$ | % diff |
| 0.3197                                        | 0.3190                                        | 0.0011    | -0.21% | 0.2423                                | 0.2419                                | 0.0008    | -0.16% |
| 0.4241                                        | 0.4200                                        | 0.0010    | -0.96% | 0.2978                                | 0.2958                                | 0.0007    | -0.68% |
| 0.5826                                        | 0.5752                                        | 0.0037    | -1.26% | 0.3681                                | 0.3652                                | 0.0024    | -0.80% |
| 0.7431                                        | 0.7295                                        | 0.0030    | -1.82% | 0.4263                                | 0.4218                                | 0.0018    | -1.05% |
